# Supplementary material
Source: PubMed Central journal article supplement (PMC1913164)
Supplement: biophysj_93_3_981__1.pdf [file biophysj_93_3_981__1.pdf]

## Supplementary Material

| Bond    | Bond length (Å) | Bond angle (°) | Dihedral angle (°) |
|---------|-----------------|----------------|--------------------|
| 2-3     | 1.500           |                |                    |
| 3=4     | 1.347           | 124.5          |                    |
| 4-5     | 1.458           | 126.8          | -180.0             |
| 5=6     | 1.366           | 118.4          | -180.0             |
| 6-7     | 1.437           | 128.2          | -180.0             |
| 7=8     | 1.364           | 123.2          | -179.4             |
| 8-9     | 1.445           | 126.5          | 179.6              |
| 9=10    | 1.372           | 118.7          | -179.4             |
| 10-11   | 1.432           | 127.6          | 179.2              |
| 11=12   | 1.365           | 123.9          | 176.2              |
| 12-13   | 1.442           | 128.8          | -178.2             |
| 13=14   | 1.370           | 119.1          | 173.3              |
| 14-15   | 1.432           | 126.8          | -175.1             |
| 15=15'  | 1.370           | 125.9          | 174.6              |
| 15'-14' | 1.430           | 125.1          | 0.0                |
| 14'=13' | 1.368           | 128.3          | -168.9             |
| 13'-12' | 1.446           | 117.0          | 180.0              |
| 12'=11' | 1.356           | 127.5          | -177.0             |
| 11'-10' | 1.445           | 122.4          | 179.4              |
| 10'=9'  | 1.352           | 127.4          | -177.7             |
| 9'-8'   | 1.506           | 121.0          | 180.0              |
| 5-Me    | 1.509           | 118.0          | 0.0                |
| 9-Me    | 1.511           | 118.3          | 1.0                |
| 13-Me   | 1.505           | 118.6          | -4.7               |
| 13'-Me  | 1.509           | 123.4          | 1.7                |
| 9'-Me   | 1.503           | 123.7          | 0.3                |

Table 2: This table lists bond lengths, bond angles and dihedral angles for the optimized non-planar 15,15'-cis spheroidene structure used for our frequency calculations reported in Table 1. The Cartesian coordinates in the X-ray structure (11, 20) of the five methyl groups were fixed. For this particular optimization the 14-15=15'-14' dihedral angle was also fixed at 0.0°. The value for this dihedral was not found to significantly influence the calculated frequencies or compositions. The angles are defined from top to bottom in the table. The bond angle listed by the 3=4 bond therefore refers to the 2-3=4 bond angle. The dihedral angle listed by the 4-5 bond refers to the 2-3=4-5 dihedral angle, etc.
